# Supplementary material
Source: publisher figshare collection journal article supplement (https://karger.figshare.com/articles/dataset/_/3803124)
Supplement: Supplementary file 1 [file 1]

Appendix Table 1. Pedigree types

| Pedigree | Number of Offspring | Number of Siblings | Number of Spouse |
|----------|---------------------|--------------------|------------------|
| 1        | 0                   | 1                  | 0                |
| 2        | 0                   | 2                  | 0                |
| 3        | 0                   | 3                  | 0                |
| 4        | 0                   | 4                  | 0                |
| 5        | 2                   | 0                  | 1                |
| 6        | 3                   | 0                  | 1                |
| 7        | 4                   | 0                  | 1                |
| 8        | 2                   | 1                  | 1                |
| 9        | 3                   | 1                  | 1                |
| 10       | 4                   | 1                  | 1                |
| 11       | 2                   | 2                  | 1                |
| 12       | 3                   | 2                  | 1                |
| 13       | 4                   | 2                  | 1                |
| 14       | 2                   | 3                  | 1                |
| 15       | 3                   | 3                  | 1                |
| 16       | 4                   | 3                  | 1                |
| 17       | 2                   | 4                  | 1                |
| 18       | 3                   | 4                  | 1                |
| 19       | 4                   | 4                  | 1                |
