# Supplementary material
Source: publisher figshare collection journal article supplement (https://karger.figshare.com/articles/dataset/_/3803124)

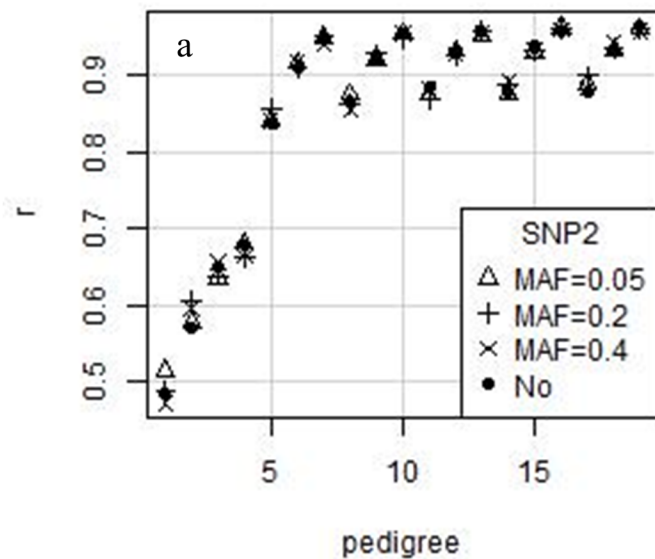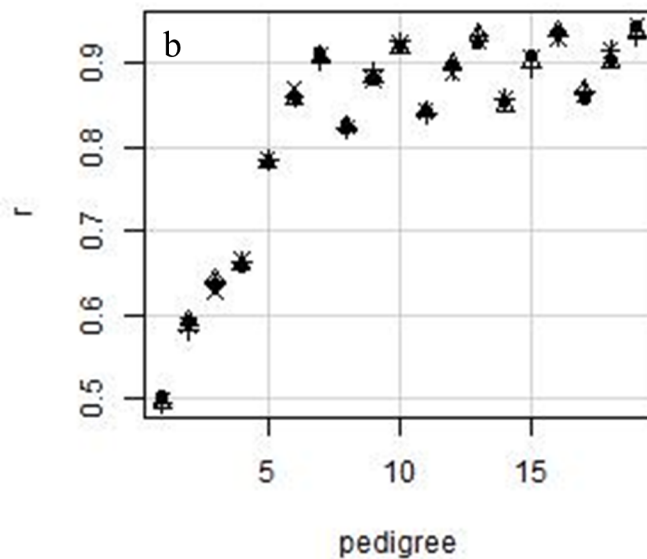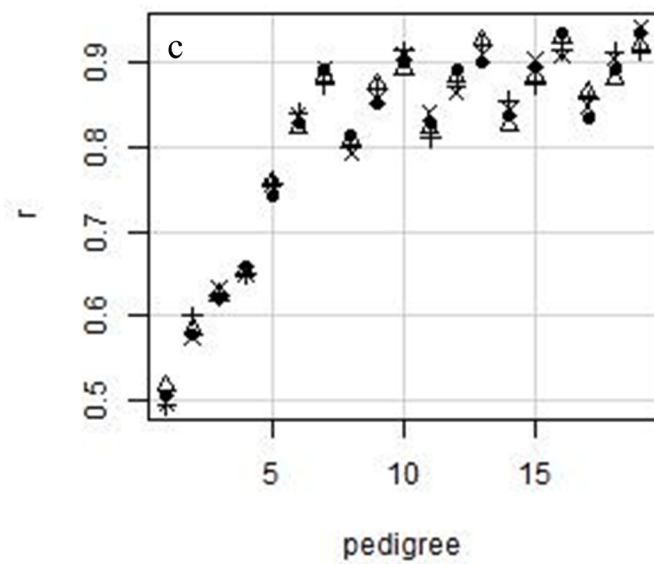

Supplement: Supplementary file 2 [file 1]
